# Supplementary material for: A dynamic association between myosteatosis and liver stiffness: Results from a prospective interventional study in obese patients
Source: PubMed Central journal article supplement — JHEP Rep. 2021 Jun 15;3(4):100323. doi: 10.1016/j.jhepr.2021.100323 (PMC8321935; doi:10.1016/j.jhepr.2021.100323), 2021-06-15
Supplement: mmc1.pdf [file mmc1.pdf]

# **A dynamic association between myosteatosis and liver stiffness: Results from a prospective interventional study in obese patients**

Maxime Nachit, Nicolas Lanthier, Julie Rodriguez, Audrey M. Neyrinck, Patrice D. Cani, Laure B. Bindels, Sophie Hiel, Barbara D. Pachikian, Pierre Trefois, Jean-Paul Thissen, Nathalie M. Delzenne

## Table of contents

|               |    |
|---------------|----|
| Fig. S1.....  | 2  |
| Fig. S2.....  | 3  |
| Fig. S3.....  | 4  |
| Fig. S4.....  | 5  |
| Fig. S5.....  | 6  |
| Fig. S6.....  | 7  |
| Table S1..... | 8  |
| Table S2..... | 9  |
| Table S3..... | 10 |
| Table S1..... | 11 |

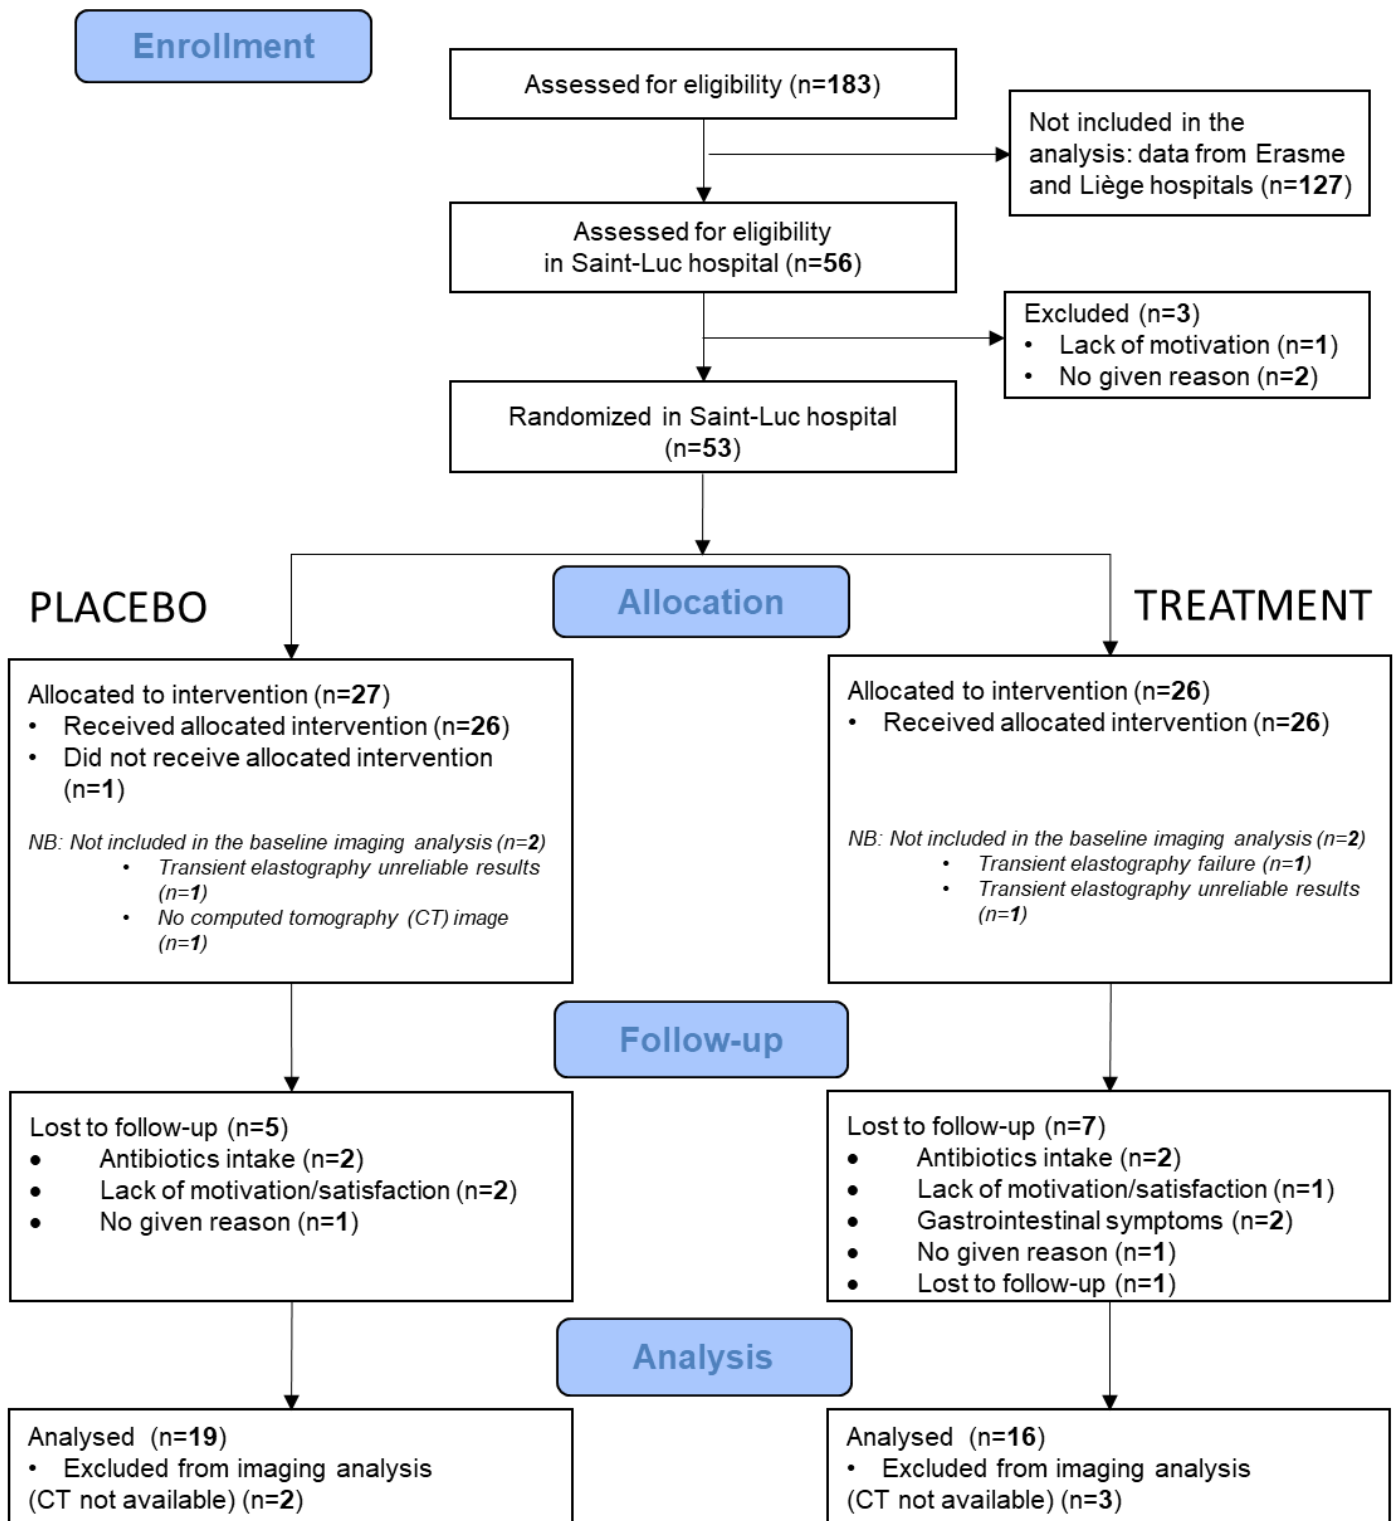

**Fig. S1. CONSORT Flow diagram.**

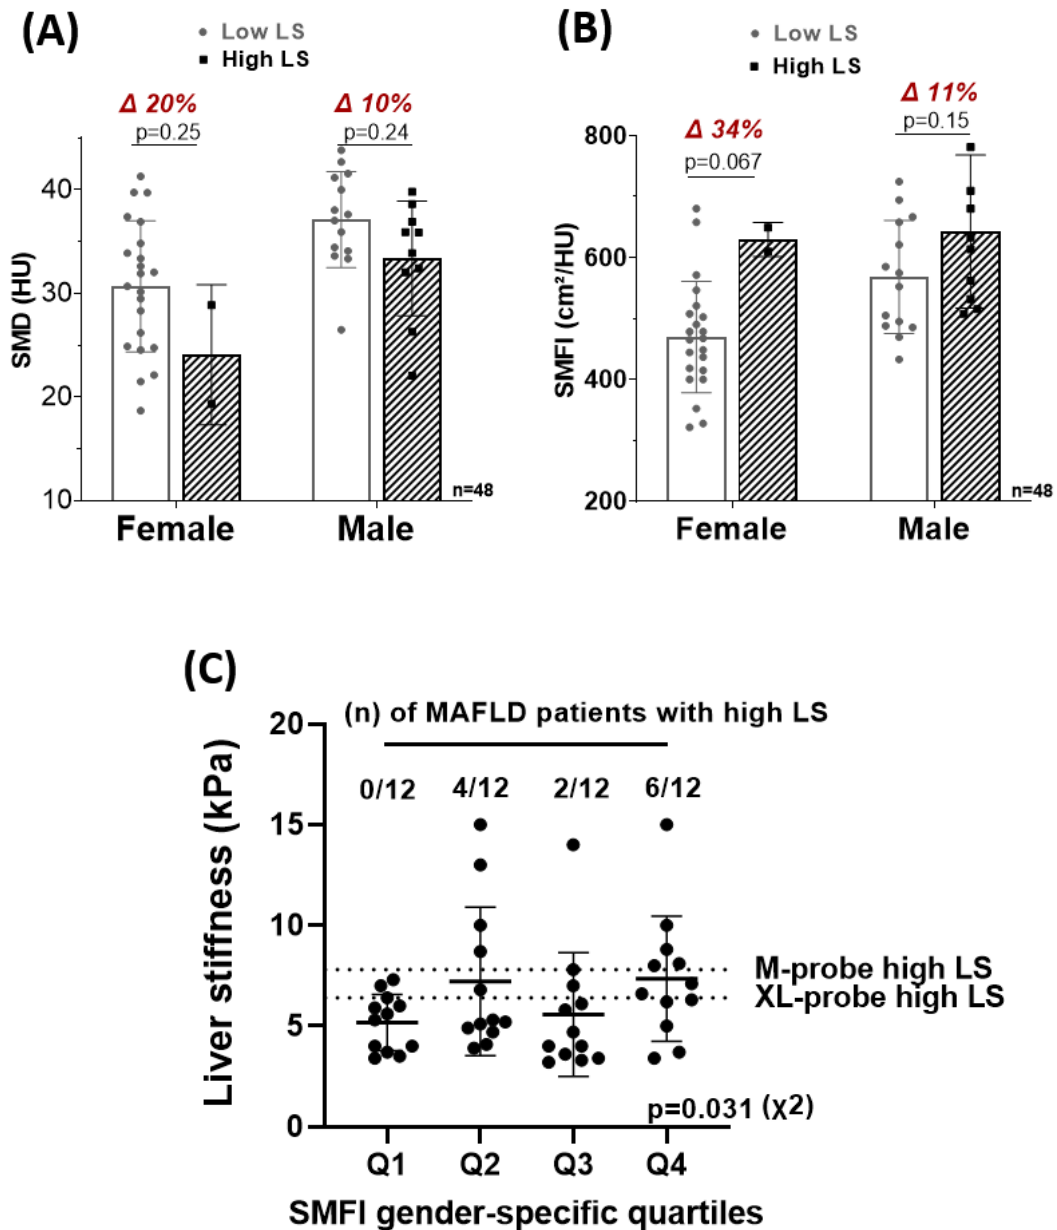

**Fig. S2. Gender-stratification of SMFI in relation with liver stiffness.** (a) Skeletal muscle density (SMD) and (b) skeletal muscle fat index (SMFI) in male and female patients sub-divided according to liver stiffness (LS) (Female  $n=24$  and Male  $n=24$ ) (two-way ANOVA,  $n=48$ ). (c) Gender-specific quartile stratification of liver stiffness values according to SMFI values. Chi-squared test.

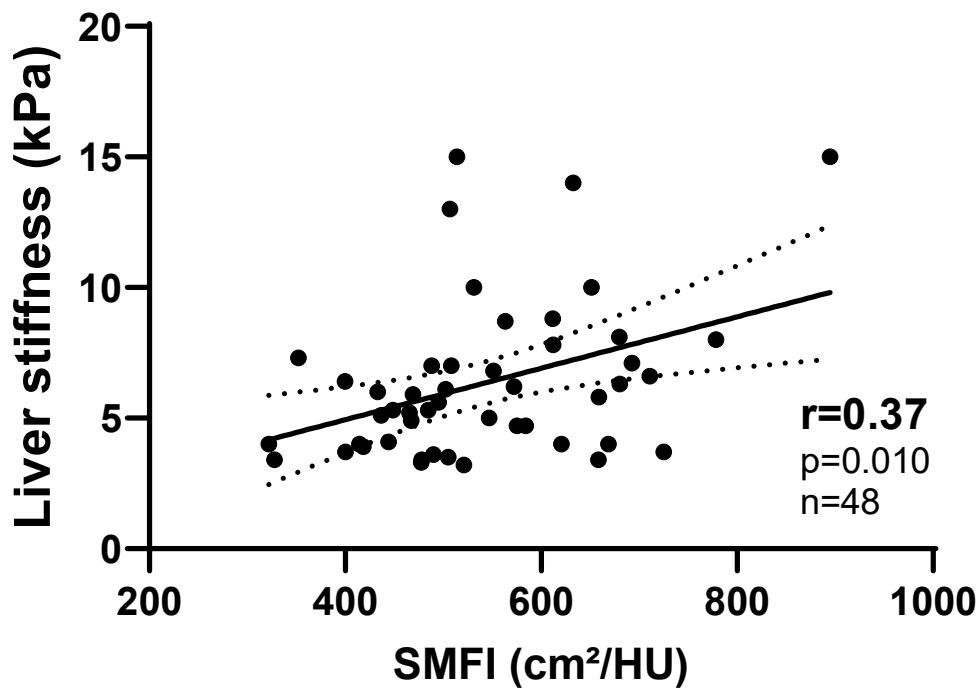

**Fig. S3. SMFI significantly correlates with liver stiffness.** Spearman's correlation between liver stiffness and skeletal muscle fat index (SMFI) at baseline. Dotted line = 95% confidence interval.

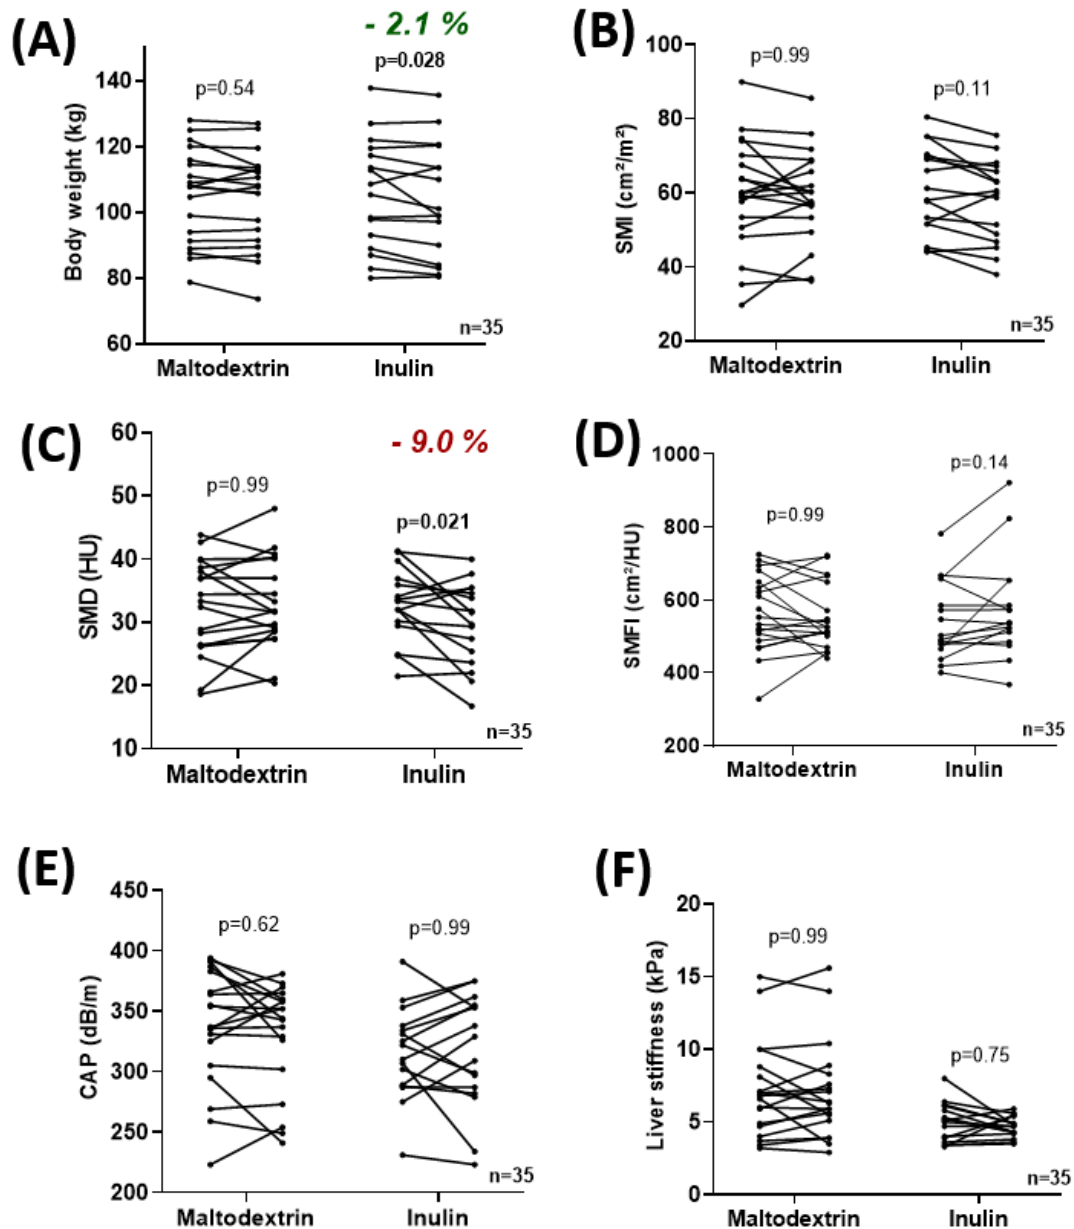

**Fig. S4. Inulin supplementation is associated with significant weight loss and decreased muscle mass and density.** (a) Body weight, (b) skeletal muscle index (SMI), (c) skeletal muscle density (SMD), (d) skeletal muscle fat index (SMFI), (e) controlled attenuation parameter (CAP) and (f) liver stiffness in patients sub-divided according to dietary intervention (Maltodextrin, n=19 or Inulin, n=16) at baseline and after dietary regimen completion (3 months) (Paired sample t-test, n=35). All data are mean  $\pm$  SD. Significant differences considered at  $p < 0.05$ .

**Before intervention**

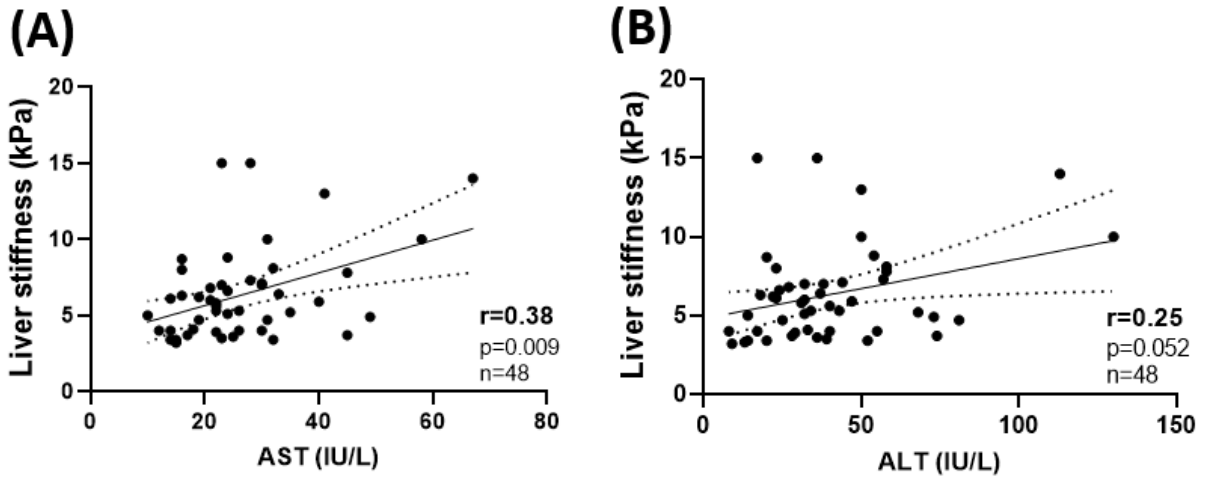

**After intervention**

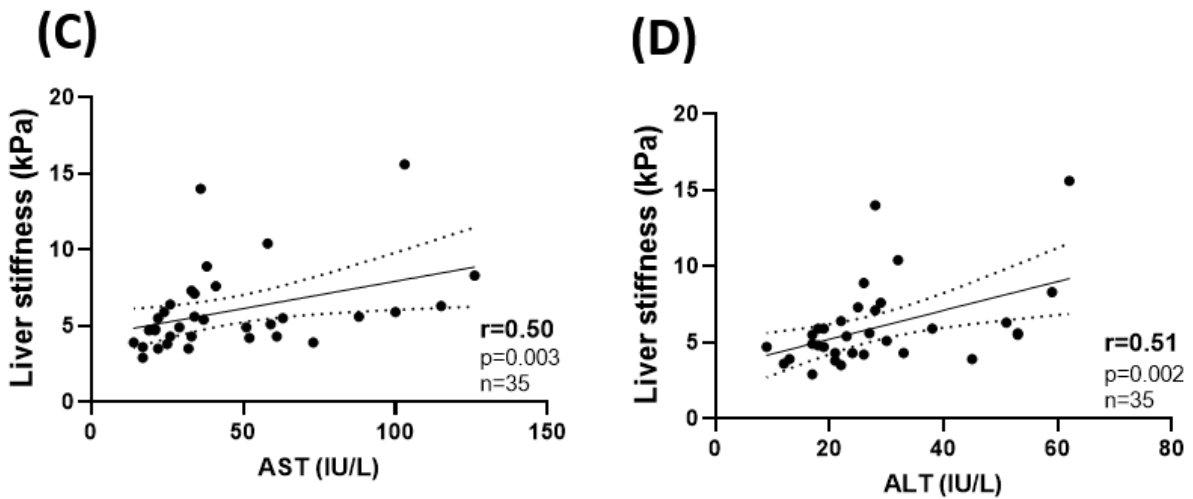

**Fig. S5. Liver stiffness correlates with ALT and AST serum levels before and after intervention.** Spearman's correlations between ALT or AST and liver stiffness at baseline (a and b) and after intervention (c and d). Dotted line = 95% confidence interval.

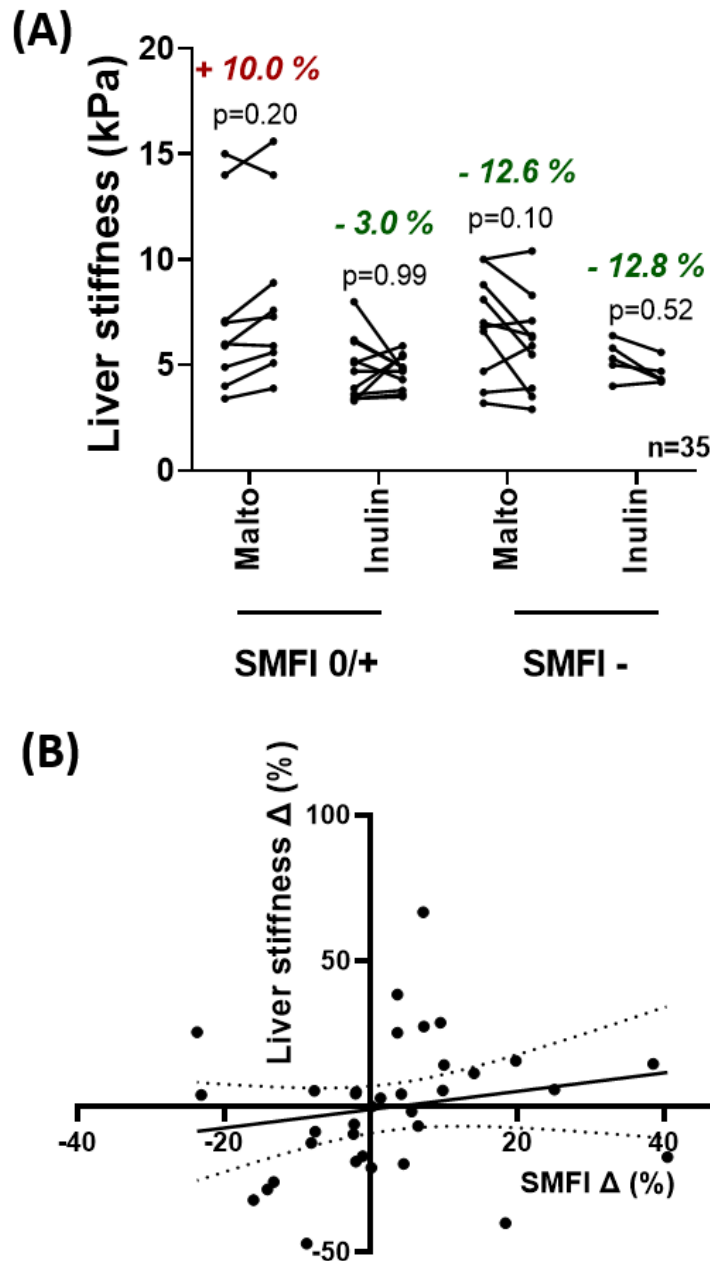

**Fig. S6. Decreased liver stiffness is not explained by intervention in patients that decreased SMFI.** (a) Liver stiffness in patients stratified according to skeletal muscle fat index (SMFI) changes and dietary supplementation (two-way ANOVA, n=35 with maltodextrin n=19 and inulin n=16). Significant differences considered at  $p < 0.05$ . (b) Spearman's correlations between liver stiffness change (%) and SMFI change (%) after intervention. Dotted lines = 95% confidence interval.

**Table S1.** Pearson correlation analysis of CT-SMI vs BIA muscle parameters : BIA-SMI<sub>ht<sup>2</sup></sub> is the most correlated with gold standard CT-SMI

|                                                                                                                                                                                                                                                                                                                                                                                                                                                                             | <b>CT - SMI</b>        |
|-----------------------------------------------------------------------------------------------------------------------------------------------------------------------------------------------------------------------------------------------------------------------------------------------------------------------------------------------------------------------------------------------------------------------------------------------------------------------------|------------------------|
| <b>CT- Psoas muscle index</b>                                                                                                                                                                                                                                                                                                                                                                                                                                               | r = 0.79<br>p < 0.0001 |
| <b>BIA – Fat free mass</b>                                                                                                                                                                                                                                                                                                                                                                                                                                                  | r = 0.56<br>p <0.0001  |
| <b>BIA-SMI<sub>bw</sub></b>                                                                                                                                                                                                                                                                                                                                                                                                                                                 | r = 0.49<br>p = 0.001  |
| <b>BIA-SMI<sub>ht<sup>2</sup></sub></b>                                                                                                                                                                                                                                                                                                                                                                                                                                     | r = 0.70<br>p <0.0001  |
| <p><u>Abbreviations:</u> CT – Psoas muscle index = psoas muscle area at L3 divided by height<sup>2</sup>, BIA – Fat Free mass : Fat free mass derived from bioelectrical impedance analysis; BIA-SMI<sub>bw</sub> = BIA – Body weight scaled muscle mass index = BIA – Fat Free mass x 100 divided by body weight; BIA-SMI<sub>ht<sup>2</sup></sub> = BIA – Height scaled muscle mass index = BIA - Fat Free Mass divided by height<sup>2</sup>. Pearson’s correlation.</p> |                        |



**Table S2.** SMFI is a significant predictor of liver stiffness.

|                                 | <b>Liver stiffness (kPa)</b> |
|---------------------------------|------------------------------|
| <b>Parameters</b>               | <b>p value</b>               |
| <b>Age</b>                      | 0.737                        |
| <b>Gender</b>                   | 0.525                        |
| <b>Waist circumference (cm)</b> | 0.198                        |
| <b>Probe type (M or XL)</b>     | 0.083                        |
| <b>SMFI (cm<sup>2</sup>/HU)</b> | <b>0.032</b>                 |

Multivariate linear regression model to predict liver stiffness

Abbreviations: SMFI, Skeletal Muscle Fat Index

**Table S3.** Body weight, muscle and liver changes after dietary intervention

|                                           | <b>Patients<br/>(n=35)</b> |                |                |
|-------------------------------------------|----------------------------|----------------|----------------|
|                                           | <b>M0</b>                  | <b>M3</b>      | <b>p value</b> |
| <b>Body weight (kg)</b>                   | 105.47 ± 15.30             | 103.94 ± 15.58 | <b>0.015</b>   |
| <b>BMI (kg/m<sup>2</sup>)</b>             | 35.98 ± 4.95               | 35.48 ± 4.84   | <b>0.025</b>   |
| <b>SMI (cm<sup>2</sup>/m<sup>2</sup>)</b> | 60.21 ± 13.42              | 58.63 ± 11.77  | 0.136          |
| <b>SMD (HU)</b>                           | 32.53 ± 6.70               | 31.40 ± 6.97   | 0.155          |
| <b>SMFI (cm<sup>2</sup>/HU)</b>           | 552.2 ± 105.3              | 562.1 ± 113.0  | 0.461          |
| <b>Liver CAP (dB/m)</b>                   | 326.94 ± 44.83             | 323.34 ± 45.57 | 0.477          |
| <b>Liver stiffness (kPa)</b>              | 6.16 ± 2.78                | 5.95 ± 2.75    | 0.388          |

Abbreviations: BMI, Body Mass Index; SMI, Skeletal Muscle Index; SMD, Skeletal Muscle Density; SMFI, Skeletal Muscle Fat Index; CAP, Controlled Attenuation Parameter.  
Repeated t test. Mean ± SD.

**Table S4.** Baseline parameters were similar between SMFI non-improvers and improvers

|                                           | <b>SMFI 0/+<br/>(n=20)</b> | <b>SMFI -<br/>(n=15)</b> | <b>p value</b> |
|-------------------------------------------|----------------------------|--------------------------|----------------|
| <b>Age</b>                                | 50 ± 11                    | 48 ± 12                  | 0.624          |
| <b>Weight (kg)</b>                        | 103.5 ± 11.9               | 108.0 ± 19.0             | 0.396          |
| <b>CAP (dB/m)</b>                         | 316 ± 46                   | 341 ± 41                 | 0.109          |
| <b>Liver stiffness<br/>(kPa)</b>          | 6.0 ± 3.2                  | 6.4 ± 2.1                | 0.719          |
| <b>SMI (cm<sup>2</sup>/m<sup>2</sup>)</b> | 60.8 ± 13.4                | 59.4 ± 13.9              | 0.766          |
| <b>SMFI (cm<sup>2</sup>/HU)</b>           | 525.3 ± 107.9              | 588.3 ± 93.2             | 0.080          |
| <b>HOMA-IR</b>                            | 29.5 ± 15.3                | 40.6 ± 24.1              | 0.264          |

**Abbreviations:** CAP, Controlled Attenuation Parameter; SMI, Skeletal Muscle Index; SMFI, Skeletal Muscle Fat Index; HOMA-IR, Homeostatic Model Assessment for Insulin Resistance.  
Student's t test. Mean ± SD.
