# Supplementary material for: A dynamic association between myosteatosis and liver stiffness: Results from a prospective interventional study in obese patients
Source: PubMed Central journal article supplement — JHEP Rep. 2021 Jun 15;3(4):100323. doi: 10.1016/j.jhepr.2021.100323 (PMC8321935; doi:10.1016/j.jhepr.2021.100323), 2021-06-15
Supplement: mmc2.pdf [file mmc2.pdf]

## JHEP Reports

### CTAT methods

Tables for a “Complete, Transparent, Accurate and Timely account” (CTAT) are now mandatory for all revised submissions. The aim is to enhance the reproducibility of methods.

- Only include the parts relevant to your study
- Refer to the CTAT in the main text as ‘Supplementary CTAT Table’
- Do not add subheadings
- Add as many rows as needed to include all information
- Only include one item per row

If the CTAT form is not relevant to your study, please outline the reasons why:

|  |
|--|
|  |
|--|

#### 1.1 Antibodies

| Name | Citation | Supplier | Cat no. | Clone no. |
|------|----------|----------|---------|-----------|
| NA   |          |          |         |           |

#### 1.2 Cell lines

| Name | Citation | Supplier | Cat no. | Passage no. | Authentication test method |
|------|----------|----------|---------|-------------|----------------------------|
| NA   |          |          |         |             |                            |

#### 1.3 Organisms

| Name | Citation | Supplier | Strain | Sex | Age | Overall n number |
|------|----------|----------|--------|-----|-----|------------------|
| NA   |          |          |        |     |     |                  |

#### 1.4 Sequence based reagents

| Name | Sequence | Supplier |
|------|----------|----------|
| NA   |          |          |

#### 1.5 Biological samples

| Description | Source | Identifier |
|-------------|--------|------------|
| NA          |        |            |

#### 1.6 Deposited data

| Name of repository | Identifier | Link |
|--------------------|------------|------|
| NA                 |            |      |

## 1.7 Software

| Software name  | Manufacturer      | Version |
|----------------|-------------------|---------|
| Sliceomatic    | Tomovision        | 4.3     |
| SPSS           | IBM               | 24      |
| Graphpad Prism | Graphpad software | 8       |

## 1.8 Other (e.g. drugs, proteins, vectors etc.)

|    |  |  |
|----|--|--|
| NA |  |  |
|    |  |  |

## 1.9 Please provide the details of the corresponding methods author for the manuscript:

**Nathalie Delzenne**  
**LDRI**  
**Avenue Mounier 73/B1.73.11**  
**1200 Woluwe-Saint-Lambert**  
**Nathalie.delzenne@uclouvain.be**

## 2.0 Please confirm for randomised controlled trials all versions of the clinical protocol are included in the submission. These will be published online as supplementary information.

**Yes.** The trial protocol was published on protocols.io ([dx.doi.org/10.17504/protocols.io.baidica6](https://dx.doi.org/10.17504/protocols.io.baidica6)) and the trial was registered at ClinicalTrials.gov under identification number NCT03852069.
