# Supplementary material for: A dynamic association between myosteatosis and liver stiffness: Results from a prospective interventional study in obese patients
Source: PubMed Central journal article supplement — JHEP Rep. 2021 Jun 15;3(4):100323. doi: 10.1016/j.jhepr.2021.100323 (PMC8321935; doi:10.1016/j.jhepr.2021.100323), 2021-06-15
Supplement: mmc6.pdf [file mmc6.pdf]

## Comité d'Éthique Hospitalo-Facultaire

Brussels, 18 March 2019

*To the principal investigator:*  
**Prof. Jean-Paul THISSEN**  
Endocrinologie  
Cliniques Universitaires Saint-Luc

*To the Ethics Committee's Chair man:*  
Hôpital Erasme  
CHU de Liège

### *AMENDMENT – positive opinion*

**Object : 2014/26SEP/488 - Belgian n° : B403201422056**

**Protocol number : 2014-09-01**

**Acronym : FOOD4GUT**

**Title** : études d'intervention nutritionnelle visant à prouver l'impact santé de l'apport en nutriments coliques (consommation de légumes et/ou supplémentation en fibres prébiotiques ) chez les patients obèses et chez les sujets sains.

Dear colleague,

The Ethics Committee Hospitalo-Facultaire Saint-Luc – UCL received and examined the substantial amendment related to the study mentioned here above and on increasing duration of the study (until 31.12.2022).

As leading Ethics Committee designated by the sponsor, according to the directives of the Belgian law of 7 May 2004, we provide a positive opinion about this amendment and agree to the continuation of the project.

We remind the investigator that he is personally responsible for this study and the sponsor that he is responsible for the language compliance of the information and informed consent forms and their distribution to the non-leading Ethics Committee.

We wish to assure you, dear Colleague, of our highest consideration.



Pharm. P. de PIERPONT  
Member

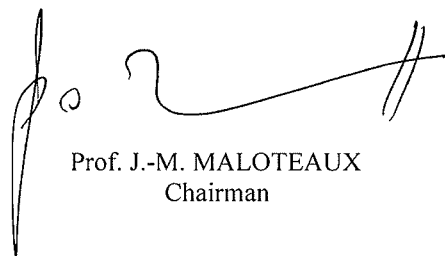

Prof. J.-M. MALOTEAUX  
Chairman

## Comité d'Éthique Hospitalo-Facultaire

### COMPOSITION DU COMITE D'ETHIQUE (au 18 mars 2019)

- Président :** MALOTEAUX Jean-Marie, Docteur en médecine
- Vice-Présidents :** DUVEILLER Véronique, Pharmacien  
MAES Marc, Docteur en médecine  
SCHAMPS Geneviève, Juriste
- Secrétaire :** LIESSE Marie-Chantal, Infirmière
- Docteurs en médecine (Cliniques Universitaires Saint-Luc et/ou à la Faculté de Médecine) :**  
BERLIERE Martine  
HORSMANS Yves  
HOUTEKIE Laurent  
HUMBLET Yves  
REDING Raymond  
ROEGIERS Luc  
OTTE Jean-Bernard (i)  
van den HOVE-VANDENBROUCKE Marie-France (i)
- Médecins omnipraticien ou extérieur aux Cliniques :**  
LAMY Dominique  
EVRARD Patrick (Cliniques Mont-Godinne) (i)
- Ethicien :** GAZIAUX Eric
- Juristes :** VAN HELLEPUTTE Emmanuelle (i)
- Infirmières (Cliniques Universitaires Saint-Luc) et assistante sociale :**  
COUPEZ Cécile  
DETIENNE Claire (i)  
VANDEUREN Carine (AS, représentante des patients)
- Psychologue :** TERLINDEN Guibert (i)
- Collaborateurs scientifiques permanents du comité d'éthique :**
- Pharmaciennes hospitalier:** de PIERPONT Pascale (i)  
HALLEUX Séverine (i)
- Méthodologiste, PhD :** de HEMPTINNE Isabelle (i)  
GABRIEL Anne (i)

(I) Invité

*Pour l'analyse des protocoles d'études cliniques, tous les membres reçoivent l'ensemble des documents nécessaires pour formuler un avis et doivent déclarer tout conflit d'intérêt éventuel.*

*Le Comité d'Éthique fonctionne selon les directives des Bonnes Pratiques Cliniques (BPC/GCP)  
Numéro du Comité d'Éthique attribué par le Comité Consultatif de Bioéthique : 403 (agrément complet 2014-2018)  
Agreement of Institutional (non-US) Review Board: IRB 00001530 (Cliniques Universitaires Saint-Luc, e.d. August 2020)  
Federalwide Assurance (FWA) for the protection of human subjects: FWA 00003749 (Cliniques Universitaires Saint-Luc, e.d. September 2021)  
Agreement of Institutional (non-US) Review Board: IRB 00008535 (Université Catholique de Louvain, e.d. August 2020)  
Federalwide Assurance (FWA) for the protection of human subjects: FWA 00018229 (Université catholique de Louvain, e.d. September 2021)  
Accreditation by the Association for Accreditation of Human Research Protection Programs (AAHRPP) 2015 –  
Accreditation by the Belgian Federal Agency for Medicines and Health Products (FAMHP/AFMPS) 2015 -*
