# Supplementary material for: A dynamic association between myosteatosis and liver stiffness: Results from a prospective interventional study in obese patients
Source: PubMed Central journal article supplement — JHEP Rep. 2021 Jun 15;3(4):100323. doi: 10.1016/j.jhepr.2021.100323 (PMC8321935; doi:10.1016/j.jhepr.2021.100323), 2021-06-15
Supplement: mmc7.pdf [file mmc7.pdf]

**Comité d'Éthique Hospitalo-Facultaire**

*A l'investigateur responsable:*

**Prof. Jean-Paul THISSEN**  
**Endocrinologie**  
**Cliniques Universitaires St. LUC (UCL)**

*Au président du comité d'Éthique de:*

**Hôpital Erasme**  
**CHU de Liège**

***AMENDEMENT – avis favorable***

**Concerne : 2014/26SEP/488 - N° Enregistrement Belge : B403201422056**

**Intitulé** : études d'intervention nutritionnelle visant à prouver l'impact santé de l'apport en nutriments coliques ( consommation de légumes et/ou supplémentation en fibres prébiotiques ) chez les patients obèses et chez les sujets sains.

Cher Collègue,

Le Comité d'Éthique Hospitalo-Facultaire Saint-Luc - UCL a pris connaissance de l'amendement substantiel relatif à l'étude susmentionnée et portant sur la mise à jour des documents suivants:

- Protocole v4.0 dd 08.02.2016
- Instruction de prélèvement des selles (version 02.2016)
- Instruction de prélèvement d'urine (version 02.2016)

En tant que comité d'éthique principal désigné par le promoteur, selon les directives de la loi du 07 mai 2004, nous approuvons cet amendement et marquons notre accord pour la poursuite de ce projet.

Nous rappelons à l'investigateur qu'il est personnellement responsable de cette étude et au promoteur qu'il est responsable de la conformité linguistique des formulaires d'information et de consentement et de leur distribution aux différents comités d'éthique locaux.

Nous vous prions d'agréer, cher Collègue, l'expression de nos sentiments les meilleurs.

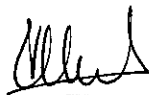

Pharm. P. de PIERPONT  
Membre



Prof. J.-M. MALOTEAUX  
Président

|                                                                                   |                                                       |                                 |
|-----------------------------------------------------------------------------------|-------------------------------------------------------|---------------------------------|
|  | <b>Formulaire d'approbation étude non commerciale</b> |                                 |
|                                                                                   | N°: CEHF-FORM-008 / REV 004                           | Date d'application : 28/10/2013 |
| Rédigé par : Florence DEFRESNE, Pascale DE PIERPONT, Jean-Marie MALOTEAUX         | Vérifié par : Florence DEFRESNE                       |                                 |
| Liens vers :                                                                      |                                                       |                                 |

**Formulaire d'approbation (Etude non commerciale)**  
**Document pour le Comité d'Ethique Hospitalo-Facultaire Saint-Luc - UCL (403)**  
*avenue Hippocrate 55.14 – 1200 Bruxelles*

Nom de l'investigateur responsable  
et son adresse + numéro de fax à insérer dans le cadre :

Jean-Paul THISSEN, M.D., Ph.D.  
Service d'Endocrinologie et Nutrition  
Cliniques Universitaires Saint-Luc  
Avenue Hippocrate, 55 Bte 1.55.06  
B-1 200 Brussels  
Téléphone : 02/ 764 54 69  
Fax : 02/764 54 79

Intitulé du protocole : Etude d'intervention nutritionnelle visant à prouver l'impact santé de l'apport en nutriments coliques (consommation de légumes et/ou supplémentation en fibres prébiotiques) chez les patients obèses

Référence du Comité d'Ethique : 2014/26 SEP/488

Le Comité d'Ethique Hospitalo-Facultaire de l'UCL a bien

- reçu
- examiné
- approuvé

les documents repris ci-dessous : (version n° ..., date, ... à compléter par l'investigateur responsable)

- Protocole v4.0
- Instruction prélèvement de selles et instruction prélèvement d'urine

Date :

Professeur J.M. MALOTEAUX

Cachet (avec nom du Comité d'Ethique et adresse + nom du Président)

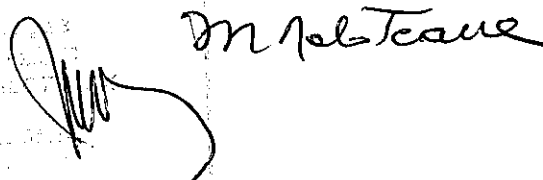  
**J.M. Maloteaux**

22.2.16

**Comité d'Éthique Hospitalo-Facultaire**

**COMPOSITION DU COMITE D'ETHIQUE (depuis le 11 décembre 2015)**

- Président :** MALOTEAUX Jean-Marie, Docteur en médecine
- Vice-Présidents :** DUVEILLER Véronique, Pharmacienne  
MAES Marc, Docteur en médecine  
SCHAMPS Geneviève, Juriste
- Secrétaire :** LIESSE Marie-Chantal, Infirmière
- Docteurs en médecine (Cliniques Universitaires Saint-Luc et/ou à la Faculté de Médecine) :**  
BERLIERE Martine  
HORSMANS Yves  
REDING Raymond  
ROEGIERS Luc  
de BARSY Thierry (i)  
DESMEDT Marianne (i)  
OTTE Jean-Bernard (i)  
van den HOVE-VANDENBROUCKE Marie-France (i)
- Médecins omnipraticien ou extérieur aux Cliniques :**  
ORBAN Thomas  
EVRARD Patrick (Cliniques Mont-Godinne) (i)
- Ethicien :** GAZIAUX Eric
- Juristes :** MASSION Jacques (i)  
VAN HELLEPUTTE Emmanuelle (i)
- Infirmières (Cliniques Universitaires Saint-Luc) et assistante sociale :**  
COUPEZ Cécile  
DOOMS Marie  
VANDEUREN Carine (AS, représentante des patients)
- Psychologue :** TERLINDEN Guibert (i)
- Pharmacien hospitalier des Cliniques Universitaires Saint-Luc :**  
de PIERPONT Pascale (i)
- Méthodologiste :** LANTIN Anne-Catherine (i)

(i) invité

*Pour l'analyse des protocoles d'études cliniques, tous les membres reçoivent l'ensemble des documents nécessaires pour formuler un avis et doivent déclarer tout conflit d'intérêt éventuel.*

*Le Comité d'Éthique fonctionne selon les directives des Bonnes Pratiques Cliniques (BPC/GCP)*

*Numéro du Comité d'Éthique attribué par le Comité Consultatif de Bioéthique : 403 (agrément complet 2014-2018)*

*Agreement of Institutional (non-US) Review Board: IRB 00001530 (Cliniques Universitaires Saint-Luc)*

*Federalwide Assurance (FWA) for the protection of human subjects: FWA 00003749 (Cliniques Universitaires Saint-Luc, e.d. November 2016)*

*Agreement of Institutional (non-US) Review Board: IRB 00008535 (Université Catholique de Louvain)*

*Federalwide Assurance (FWA) for the protection of human subjects: FWA 00018229 (Université Catholique de Louvain, e.d. December 2016)*

*Accreditation by the Association for Accreditation of Human Research Protection Programs (AAHRPP) 2015 –*

*Accreditation by the Belgian Federal Agency for Medicines and Health Products (FAMHP/AFMPS) 2015 -*
