# Supplementary material for: A dynamic association between myosteatosis and liver stiffness: Results from a prospective interventional study in obese patients
Source: PubMed Central journal article supplement — JHEP Rep. 2021 Jun 15;3(4):100323. doi: 10.1016/j.jhepr.2021.100323 (PMC8321935; doi:10.1016/j.jhepr.2021.100323), 2021-06-15
Supplement: mmc8.pdf [file mmc8.pdf]

**Comité d'Éthique Hospitalo-Facultaire**

*A l'investigateur responsable:*  
**Prof. Jean-Paul THISSEN**  
Endocrinologie  
Cliniques Universitaires St. LUC (UCL)

*Au président du comité d'Éthique de:*  
**Hôpital Erasme**  
**CHU de Liège**

**AVIS FAVORABLE DEFINITIF**

**Concerne : 2014/26SEP/488 - N° Enregistrement Belge : B403201422056**

**Intitulé :** études d'intervention nutritionnelle visant à prouver l'impact santé de l'apport en nutriments coliques ( consommation de légumes et/ou supplémentation en fibres prébiotiques ) chez les patients obèses et chez les sujets sains.

Cher Collègue,

Le Comité d'Éthique Hospitalo-Facultaire Saint-Luc - UCL a pris connaissance de l'étude susmentionnée. Nous avons examiné l'ensemble des documents concernant cette étude, y compris les documents modifiés suite aux remarques :

- Protocole v2.0 dd avril 2015
- Documents d'information et de consentement v2.0 dd avril 2015

En tant que comité d'éthique principal désigné par le promoteur (unique en Belgique), selon les directives de la loi du 07 mai 2004, nous donnons un avis favorable définitif à ce projet pour lequel nous avons reçu l'avis des comité d'éthique locaux susmentionnés et en avons tenu compte.

Nous rappelons à l'investigateur qu'il est personnellement responsable de cette étude et au promoteur qu'il est responsable de la conformité linguistique des formulaires d'information et de consentement et de leur distribution aux différents comités d'éthique locaux.

Nous vous prions d'agréer, cher Collègue, l'expression de nos sentiments les meilleurs..

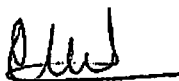

Pharm. P. de PIERPONT  
Membre



Prof. J.-M. MALOTEAUX  
Président

Avenue Hippocrate 55.14  
Tour Harvey, niveau 0  
1200 Bruxelles

Tél. : 02/764.55.14  
Fax : 02/764.55.13

E-mail : [commission.ethique-saint-luc@uclouvain.be](mailto:commission.ethique-saint-luc@uclouvain.be)

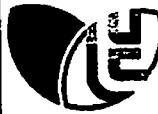

Cliniques universitaires  
**SAINT-LUC**  
UCL BRUXELLES

**Formulaire d'approbation étude non commerciale**

N°: CEHF-FORM-008 / REV 004

Date d'application : 28/10/2013

Rédigé par : Florence DEFRESNE, Pascale  
DE PIERPONT, Jean-Marie  
MALOTEUX

Vérifié par : Florence DEFRESNE

Liens vers :

*Formulaire d'approbation (Etude non commerciale)  
Document pour le Comité d'Ethique Hospitalo-Facultaire Saint-Luc - UCL (403)  
avenue Hippocrate 55.14 - 1200 Bruxelles*

Nom de l'investigateur responsable  
et son adresse + numéro de fax à insérer dans le cadre :

Professeur Jean-Paul Thissen  
Cliniques Universitaires Saint-Luc  
Avenue Hippocrate,10  
1200 Bruxelles  
  
Fax: 02 764 5479

Intitulé du protocole : Etude d'intervention nutritionnelle visant à prouver l'impact santé de l'apport en nutriments coliques ( légumes et supplémentation en fibres prébiotiques ) chez les patients obèses.

Référence du Comité d'Ethique : 2014/26SEP/488

Le Comité d'Ethique Hospitalo-Facultaire de l'UCL a bien

- reçu
- examiné
- approuvé

les documents repris ci-dessous : (version n° ..., date, ... à compléter par l'investigateur responsable)

- Protocole: **V2.0**
- Feuille d'information: **V2.0**
- Formulaire de consentement: **V2.0**
- Amendement :
- Adverse Events:
- Autres :

Date : **04.05.2015**

Professeur J.M. MALOTEUX

Cachet (avec nom du Comité d'Ethique et adresse + nom du Président)

Comité d'Ethique  
UCL - SAINT-LUC  
P.O.

Professeur J.M. MALOTEUX  
Président,  
Carine Mommens, Membre  
Avenue Hippocrate 55.14  
Tour Harvey, niveau 0  
1200 BRUXELLES

**Comité d'Éthique  
Hospitalo-Facultaire**

**COMPOSITION DU COMITE D'ETHIQUE  
(depuis le 26 mars 2015)**

**Président :** MALOTEAUX Jean-Marie, Docteur en médecine

**Vice-Président :** MAES Marc, Docteur en médecine  
SCHAMPS Geneviève, Juriste  
DUVEILLER Véronique, Pharmacienne

**Secrétaire :** LIESSE Marie-Chantal, Infirmière

**Docteurs en médecine**

**(attachés aux Cliniques Universitaires Saint-Luc et/ou à la Faculté de Médecine) :**

BERLIERE Martine  
HORMANS Yves  
REDING Raymond  
RENNOTTE Marie-Thérèse  
ROEGIERS Luc

de BARSY Thierry (i)  
DESMEDT Marianne (i)  
OTTE Jean-Bernard (i)  
van den HOVE-VANDENBROUCKE Marie-France (i)

**Médecin omnipraticien extérieur aux Cliniques :**  
ORBAN Thomas

COEN Jean-Charles (i)  
EVRARD Patrick (Cliniques Mont-Godinne) (i)

**Théologien :** GAZIAUX Eric

**Juriste :** MASSION Jacques, Juriste (i)  
VAN HELLEPUTTE Emmanuelle (i)

**Infirmières (personnel infirmier des Cliniques Universitaires Saint-Luc) et assistante sociale :**  
COUPEZ Cécile  
DOOMS Marie  
VANDEUREN Carine (AS, représentante des patients)

**Représentant de l'Aumônerie des Cliniques Universitaires Saint-Luc :**  
TERLINDEN Guibert (i)

**Pharmacien des Cliniques Universitaires Saint-Luc :**  
de PIERPONT Pascale (i)

*(i) invité*

*Pour l'analyse des protocoles d'études cliniques, tous les membres ont reçu l'ensemble des documents nécessaires pour formuler un avis et doivent déclarer tout conflit d'intérêt éventuel.*

*Le Comité d'Éthique fonctionne selon les directives des Bonnes Pratiques Cliniques (GCP)*

*Numéro du Comité d'Éthique attribué par le Comité Consultatif de Bioéthique : 403*

*Agreement of Institutional (non-US) Review Board: IRB 00001530 (Cliniques Universitaires Saint-Luc)  
Federalwide Assurance (FWA) for the protection of human subjects: FWA 00003749 (Cliniques Universitaires Saint-Luc, e.d. November 2016)*

*Agreement of Institutional (non-US) Review Board: IRB 00008535 (Université Catholique de Louvain)  
Federalwide assurance (FWA) for the protection of human subjects: FWA 00018229 (Université Catholique de Louvain, e.d. December 2016)*
